# Supplementary material for: The social impact of cultivated and plant-based meats as radical innovations in the food chain: Views from Brazil, the United States and Europe
Source: Frontiers journal article supplement (doi:10.3389/fsufs.2022.1056615), 2022-12-22
Supplement: Table_1.DOCX [file Table_1.DOCX]

**SUPPLEMENTARY DOCUMENT FOR REVIEW: SURVEY QUESTIONNAIRE**

**Demographic data**

*Location*: Brazil, United States, Europe, Other.

*Gender*: Masculine, Feminine, I prefer not to answer.

*Sector*: Research, Industry, Third sector, Government, Others.

*Function*: Researcher, Director/President, Manager, Specialist, Consultant.

*Self-judgment regarding knowledge of the sector*: I am a specialist, I have a high level of knowledge, I have a moderate level of knowledge, I know a little, I have heard about alternative meats, I do not know anything about alternative meats.

**Questions for answers on a Likert scale from 1 (strongly disagree) to 5 (strongly agree)**

*Market expectations*

Q1 - The scenario foreseen for 2040 (Gerhardt et al., 2020) applies to my country regarding cultivated meat

Q2 - The scenario foreseen for 2040 (Gerhardt et al., 2020) applies to my country regarding plant-based meat

Q3 - We will have a high demand for cultivated meat in my country

Q4 - We will have a high demand for plant-based meat in my country

*Consumer access*

Q5 - People with less purchasing power will be able to access cultivated meat within 10 years

Q6 - People with lower purchasing power will be able to access cultivated meat within 20 years

Q7 - The low income of consumers is likely to be an obstacle to the marketing of cultivated meat

Q8 - The low income of consumers is likely to be an obstacle to the marketing of plant-based meat

Q9 - The low purchasing power of consumers will become an advantage for cultivated meat, as its price decreases

Q10 - Cultivated meat should be a solution to the need for increased production and food due to the population increase

*Consumer acceptance*

Q11 - Cultivated meat will be well accepted by consumers in my country due to its positive aspects compared to conventional meat

Q12 - Cultivated meat will be healthier than conventional meat for human consumption.

Q13 - Plant-based meat products are likely to have a greater acceptance than cultivated meat in my country

*Impact on farms*

Q14 - All animal farms, regardless of size, will have their production reduced at the same intensity due to the entry of cultivated meat; i.e., there will be no different pattern of impact according to farm size

Q15 - Cultivated meat will bring opportunities for animal farmers to switch to other activities within the meat production field

Q16 - Animal producers are likely to enter new activities related to cultivated meat production

Q17 - Animal producers are likely to enter new activities related to producing plant-based products

Q18 - Cultivated meat will bring major threats to the activities of animal farmers

Q19 - Plant-based meat will bring major threats to the activities of animal farmers

Q20 - A major source of resistance will be animal producers' associations and unions

Q21 - Any resistance from animal farmers' associations tends to be temporary as new activities for them become available.

*Business opportunities along the new chain*

Q22 - Cultivated meat will generate opportunities for new ventures and businesses in the country on the first stage of the chain (suppliers of the systems)

Q23 - Regarding plant-based meat, it will bring new business opportunities for ingredient suppliers

Q24 - Cultivated meat chain is likely to create opportunities for new ventures and businesses in the country on the second stage of the chain (cultivated meat growing factories)

Q25 - Cultivated meat will bring new business and product opportunities to conventional meat processing companies

Q26 - Regarding plant-based meat, it will bring new business and product opportunities to
